# Supplementary material
Source: PubMed Central journal article supplement (PMC2930591)
Supplement: 1009622107_pnas.201009622SI.pdf [file 1009622107_pnas.201009622SI.pdf]

# Supporting Information

Sykiotis et al. 10.1073/pnas.1009622107

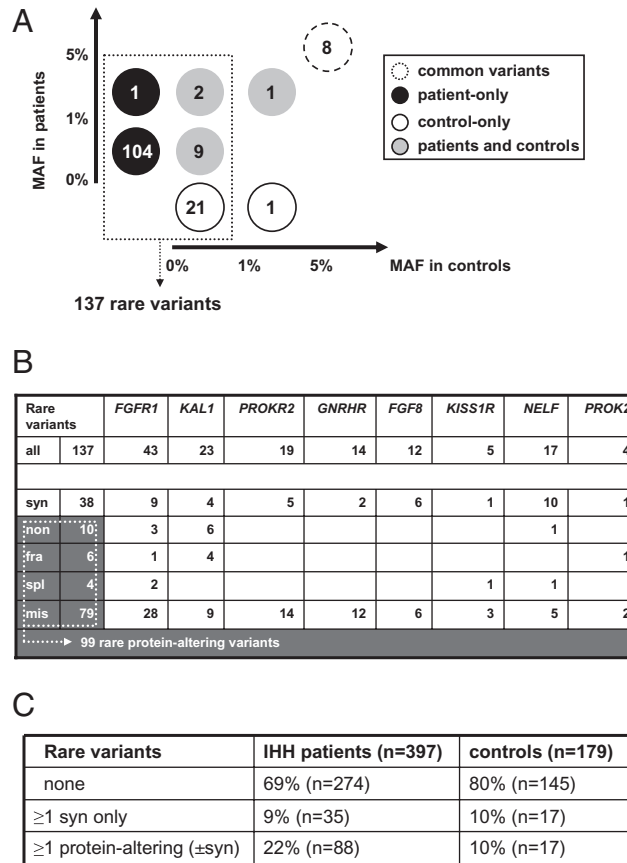

**Fig. S1.** (A) Classification of identified sequence variants by minor allele frequency (MAF) in controls and patients. (B) Categorization of rare variants by gene and predicted effect on protein sequence. *syn*, synonymous; *non*, nonsense; *fra*, frameshift; *spl*, splice site; *mis*, missense. (C) Percentages of patients and controls with no rare variants, synonymous-only variants, or protein-altering variants.

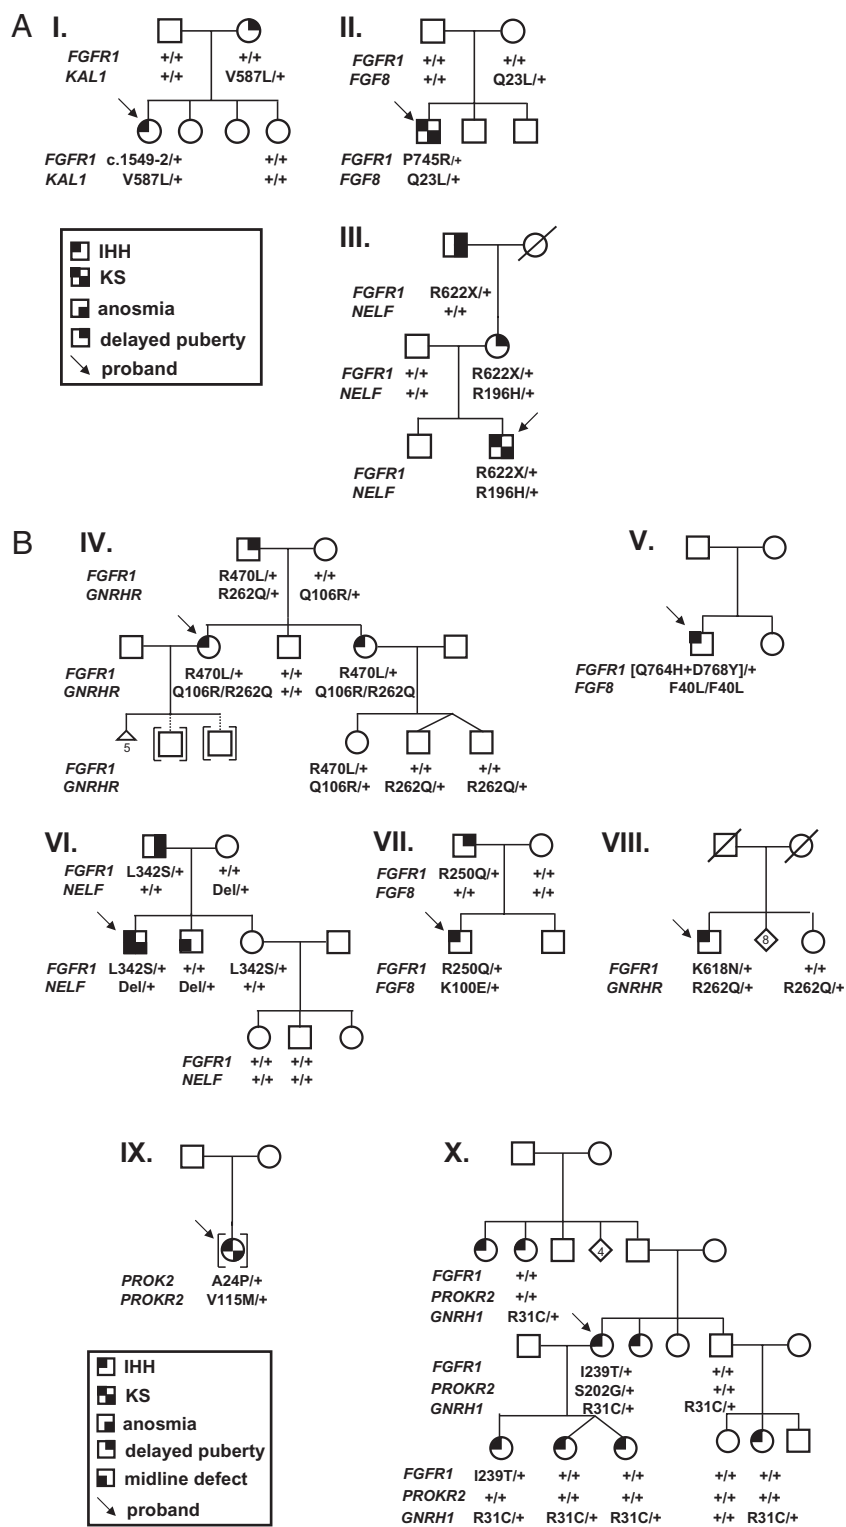

**Fig. S2.** (A) New pedigrees showing oligogenicity in isolated GnRH deficiency. (B) Pedigrees of probands with isolated GnRH deficiency included in the present study that were previously identified as oligogenic: IV (32), V (16), VI (32), VII (16), VIII (36), XI (33), and X (35). Del, c.1165-14\_22del. +, wild-type allele.

## Other Supporting Information Files

**Table S1. Identified sequence variants (listed in order of decreasing MAF in unaffected control subjects)**

[Table S1 \(XLS\)](#)

**Table S2. Patients with rare protein-altering variants**

[Table S2 \(XLS\)](#)

**Table S3. Unaffected control subjects with rare protein-altering variants**

[Table S3 \(XLS\)](#)
